# Supplementary material
Source: Research Square preprint supplement (doi:10.21203/rs.3.rs-9218535/v1)
Supplement: Supplementary file 1 [file d2ebe419cf0b8e821ac7e408.docx]

**A stable catalyst for simultaneous catalytic removal of nitrogen oxide and toluene at low temperature**

Yu Yan,1 Linmin Lao,1 Chengyan Li,*,2 Yang Yue,1,3 Guangren Qian,3 Jia Zhang 1,3,**

1 SHU Center of Green Urban Mining & Industry Ecology, School of Environmental and Chemical Engineering, Shanghai University, No. 381 Nanchen Road, Shanghai 200444, P. R. China

2 Nanjing Institute of Environmental Sciences, Ministry of Ecology and Environment of the People's Republic of China, Nanjing 210042, China

3 MGI of Shanghai University, Xiapu Town, Xiangdong District, Pingxiang City, Jiangxi, 337022, P. R. China;

Corresponding authors

* E-mail: irujam@t.shu.edu.cn


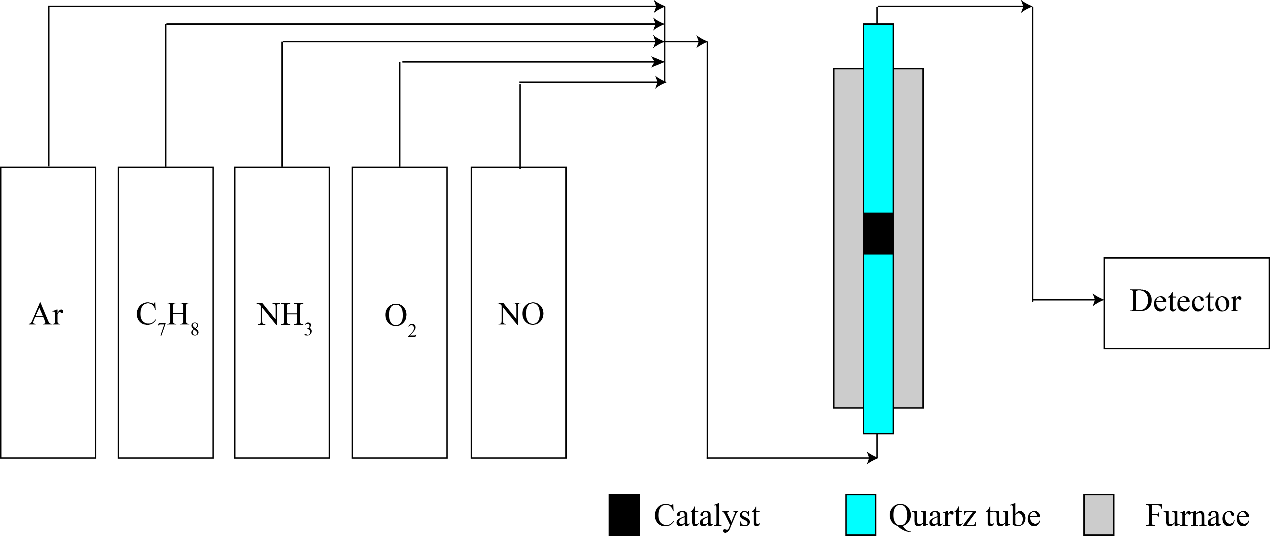


**Fig. S1**. Experimental setup.

Catalyst (1 g) was set in a quartz reactor (inner diameter = 15 mm), which was heated by a tube furnace. Then, Ar flushed the pipe system to clean residual air before a mixture gas flowed through the catalyst at a rate of 1000 mL·min−1. The mixture gas contained 1000-ppm pollutant gas (toluene, NO, or both were 500 ppm), 1000/500-ppm NH3, and 10% O2 (Ar balance), which were controlled by mass flowmeters (Beijing Seven-star Electronics Co., Ltd.). After the furnace increased to a designed temperature, residual concentrations (toluene, NH3, NO, NO2, and N2O) were detected by an MKS MultiGas infrared (IR) spectrometer.

**Fig. S2**. Conversions of NOx and toluene by V/TiO2 in the absence of O2.
